# Supplementary material for: Loss of Ambra1 promotes melanoma growth and invasion
Source: PubMed Central journal article supplement (PMC8100102; doi:10.1038/s41467-021-22772-2), 2021-05-05
Supplement: 41467_2021_22772_MOESM3_ESM.pdf [file 41467_2021_22772_MOESM3_ESM.pdf]

## **Description of Additional Supplementary Files**

File Name: Supplementary Data 1

Description: Upregulated processes in BPA<sup>-/-</sup> mice (Fisher exact test).

File Name: Supplementary Data 2

Description: RNAseq\_metadata.
